# Supplementary material for: The nociceptive activity of peripheral sensory neurons is modulated by the neuronal membrane proteasome
Source: PubMed Central journal article supplement — Cell Rep. Author manuscript; Available in PMC 2024 Jun 7. (PMC11157458; doi:10.1016/j.celrep.2024.114058), 2024-04-12
Supplement: NIHMS1988706-supplement-1.pdf [file NIHMS1988706-supplement-1.pdf]

**Cell Reports, Volume 43**

**Supplemental information**

**The nociceptive activity of peripheral  
sensory neurons is modulated  
by the neuronal membrane proteasome**

**Eric Villalón Landeros, Samuel C. Kho, Taylor R. Church, Anna Brennan, Fulya Türker, Michael Delannoy, Michael J. Caterina, and Seth S. Margolis**

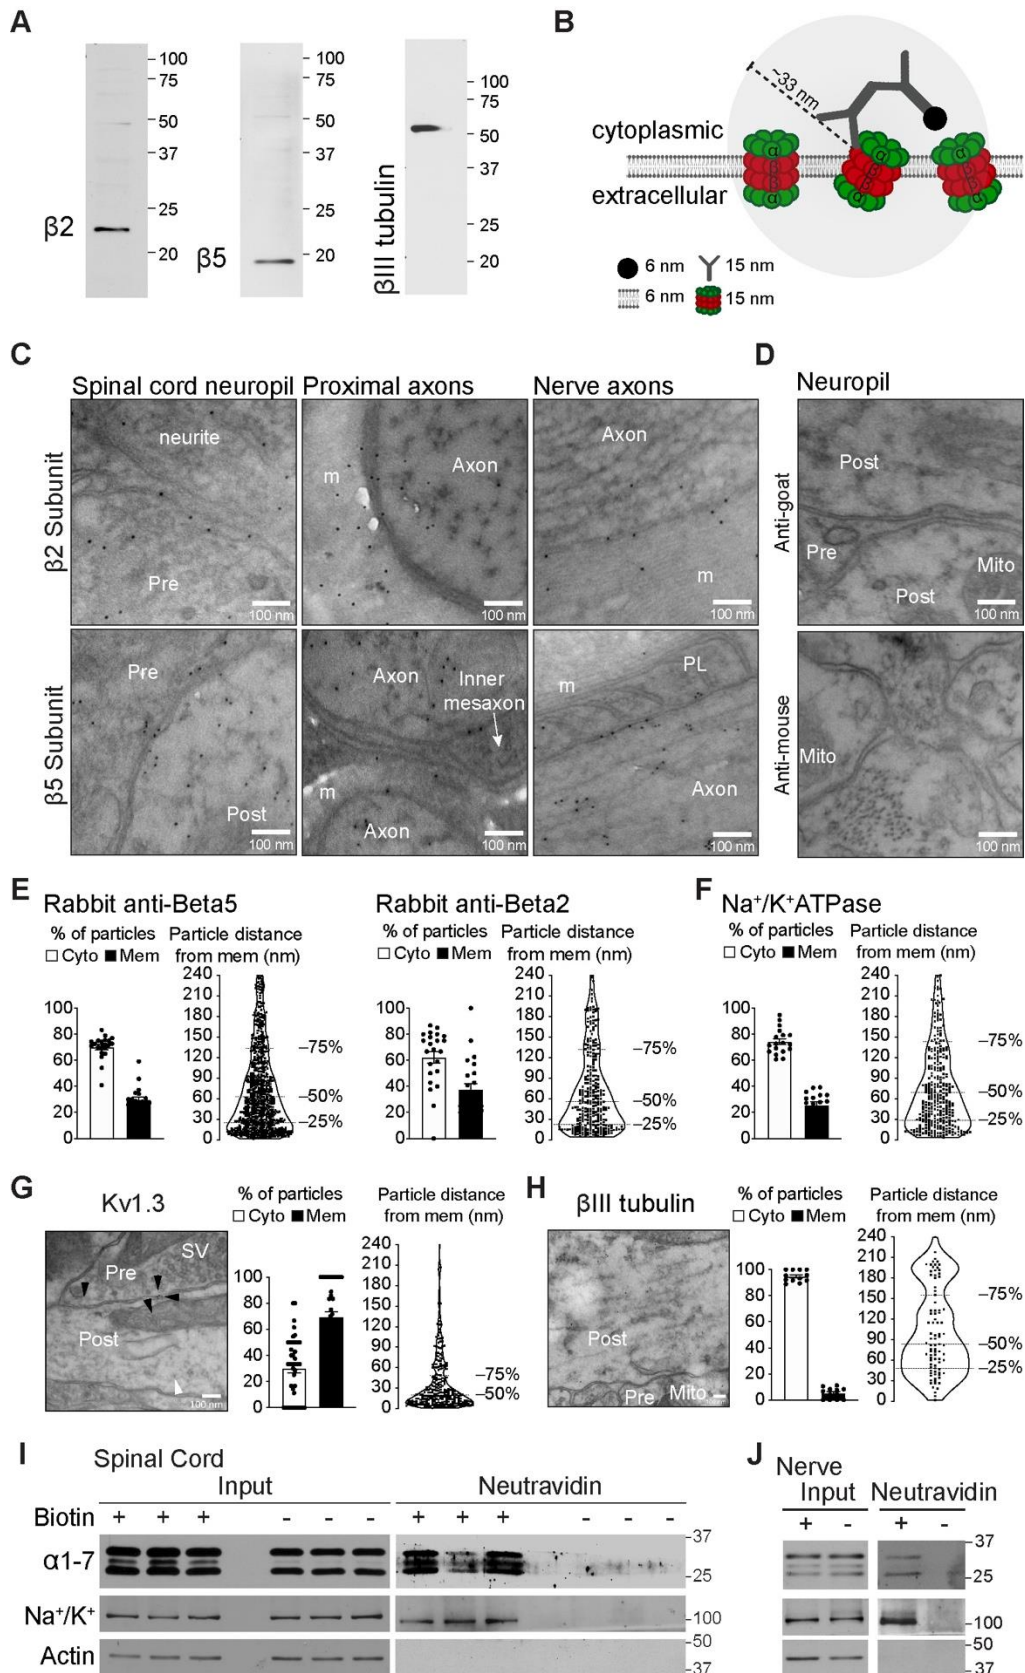

## Figure S1. Related to Figure 1.

### The NMP localizes to the membrane of PNS neurons

(A) Proteasomes were detected using antibodies specific for the catalytic core subunits  $\beta 2$  and  $\beta 5$ , and cytoplasmic control protein was detected using  $\beta$ III-Tubulin antibodies.

(B) Schematic showing immuno-EM criteria used to detect proteasomes localizing on membranes.

(C) Representative images showing gold particle labeling of proteasomes on myelinated axons of the PNS. Each black dot on micrographs represents a gold particle that labels the localization of a proteasome. Myelin (m), pre-synaptic cell (pre), post-synaptic cell (post), synaptic vesicle (SV), mitochondria (Mito), paranodal loop (PL).

(D) Representative immuno-gold micrographs of no primary antibody control showing the lack of labeling on samples treated with only secondary conjugated anti-goat-6 nm and anti-mouse-6 nm.

(E) Quantification of gold particle localization using rabbit anti- $\beta 5$  and rabbit anti- $\beta 2$  antibodies (bar graphs) and gold particle distribution relative to the membrane (violin plots). Data presented as mean  $\pm$  SEM (n = 20 - 30 micrographs analyzed from 2 independent animals).

(F) Quantification of gold particle localization using an antibody against  $\text{Na}^+/\text{K}^+$ -ATPase as membrane control (bar graph) and gold particle distribution relative to the membrane (violin plot). Data presented as mean  $\pm$  SEM (n = 20 micrographs analyzed from 2 independent animals).

(G) Representative micrographs of immuno-gold labeling of membrane control protein, Kv1.3, and quantifications (bar graph and violin plot). Data presented as mean  $\pm$  SEM (n = 35 micrographs analyzed from 2 independent animals).

(H) Representative micrographs and quantification (bar graph and violin plot) of immune-gold labeling of cytoplasmic control protein,  $\beta$ III-tubulin. Data presented as mean  $\pm$  SEM (n = 12 micrographs analyzed from 2 independent animals).

(I and J) Western blots of surface biotinylation and pulldown proteins from the spinal cord (I) and sciatic nerve (J) tissue from 1-month-old male mice. Input blots show detection of proteasome core proteins  $\alpha$ 1-7 subunits, membrane protein Na<sup>+</sup>/K<sup>+</sup>-ATPase, and cytosolic protein actin in both biotinylated and non-biotinylated samples. Western blots of neutravidin bead pulldown show the detection of core proteasome subunits  $\alpha$ 1-7 and membrane protein Na<sup>+</sup>/K<sup>+</sup>-ATPase in biotinylated samples but not in non-biotinylated tissues. Cytosolic control, actin, was not detected in pulldown protein pool. Western blots represent results obtained from multiple experiments with at least triplicate samples in each.

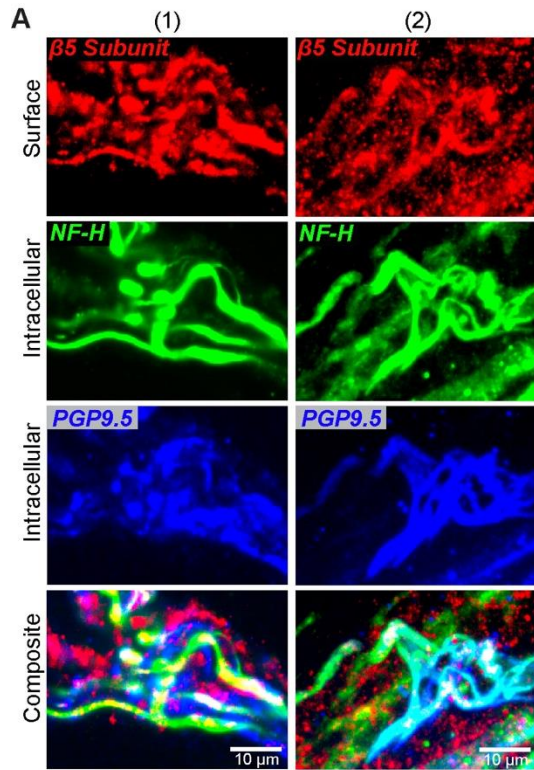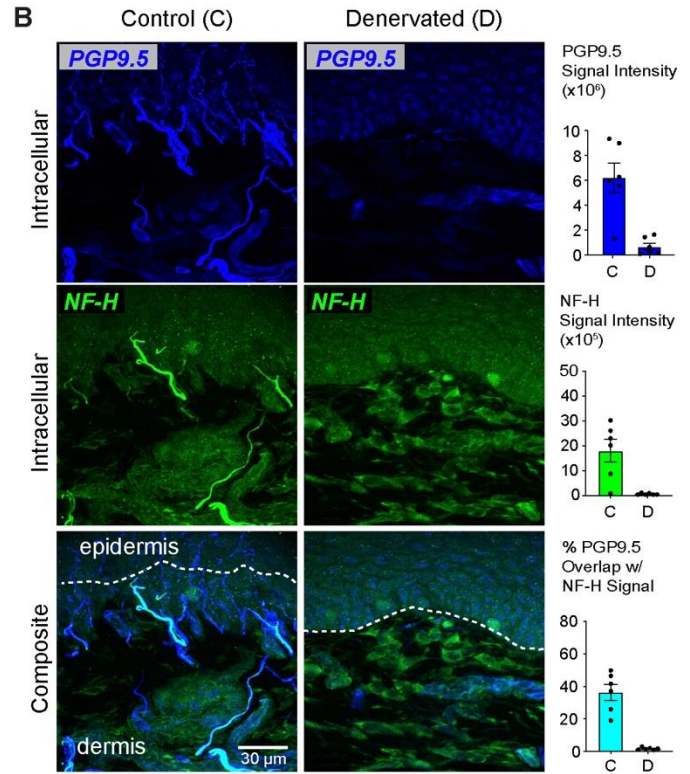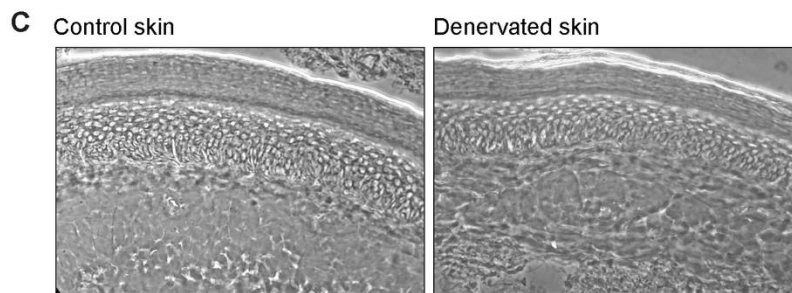

**Figure S2. Related to Figure 2.**

**Loss of paw skin innervation following nerve transection**

(A) Representative high resolution images of surface proteasome  $\beta 5$  subunit labeling (red) overlapping with nerve staining using NF-H (green) or PGP9.5 (blue) markers in the mouse hind paw skin.

(B) Representative images of mouse hind paw skin nerve staining in control and denervated paws. Denervation shows a lack of detectable nerve endings on the skin. Bar graphs (right) show quantifications of nerve staining intensity. Data are presented as mean  $\pm$  SEM (n = 6 groups of images from 3 independent animals).

(C) Representative differential interference contrast (DIC) images of control and denervated paw skin sections used for NMP and nerve labeling. Note, denervation did not affect tissue integrity.

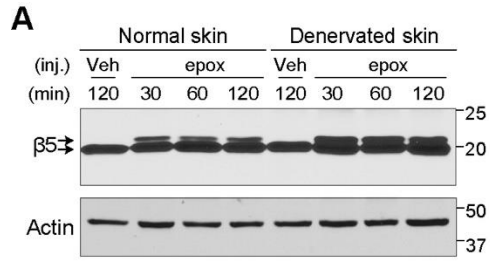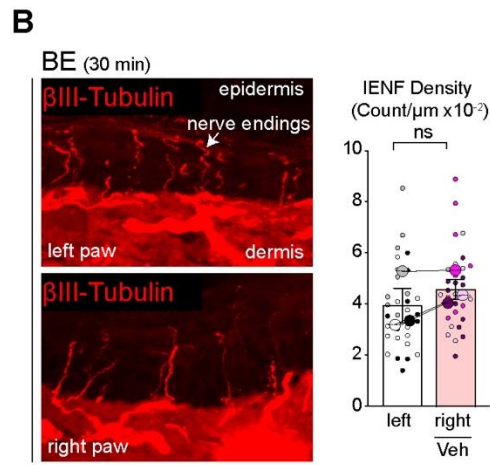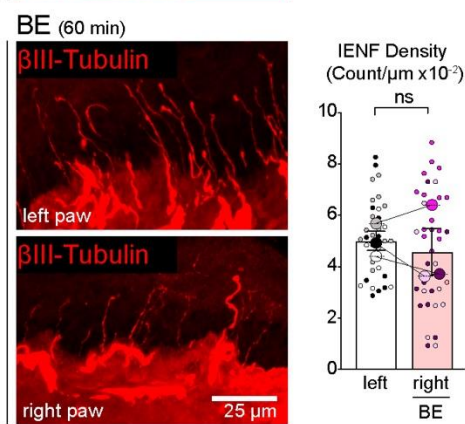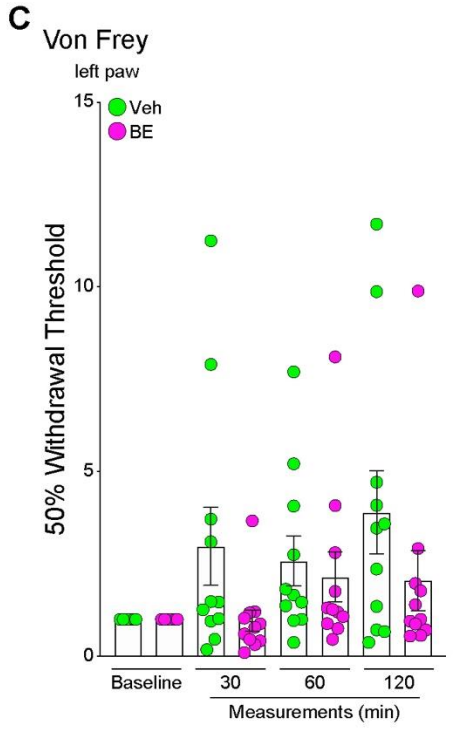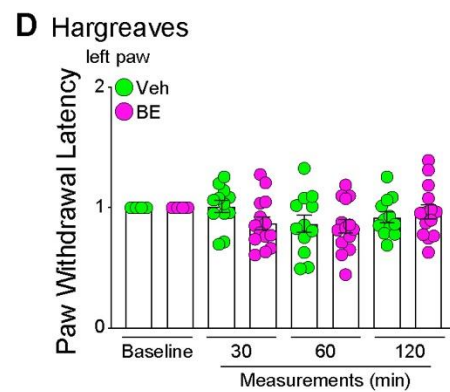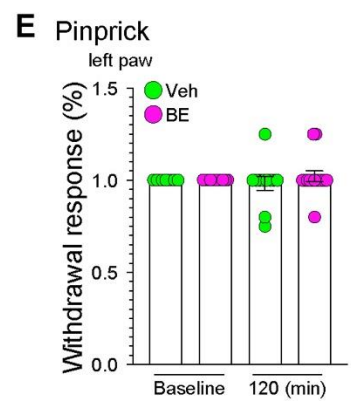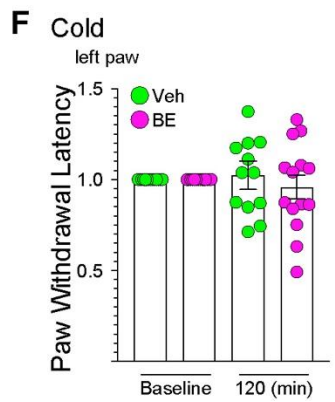

**Figure S3. Related to Figure 3.**

**Local and selective NMP inhibition does not affect nerve ending densities on paw skin**

(A) Western blotting of ipsilateral skin homogenates of paw skin treated with 10  $\mu$ M epoxomicin, showing targeting of proteasome  $\beta$ 5 subunits in both normal and denervated paw skin.

(B) Representative images of intraepidermal nerve fiber density in the skin after 30 and 60 min of BE injection into the right paw. Left paw was uninjected. Data are presented as mean  $\pm$  SEM (n = 30 images analyzed). Statistically significant differences between samples was not observed (two-tailed t-test).

(C, D, E, F) Quantification of punctate mechanical (C), heat (D), painful mechanical (E), and noxious cold sensitivity (F) tests on the contralateral paw of mice injected with vehicle (Veh) or bio-epox (BE) at several time points post-injection. Data are presented as mean  $\pm$  SEM (n = 14 (C), n = 10 - 12 (D), n = 14 (E), and n = 14 (F) mice per treatment). Statistically significant differences between samples was not observed (two-way ANOVA with a Tukey's post hoc test). All mouse behavior experiments data are normalized to baseline measurements per mouse.



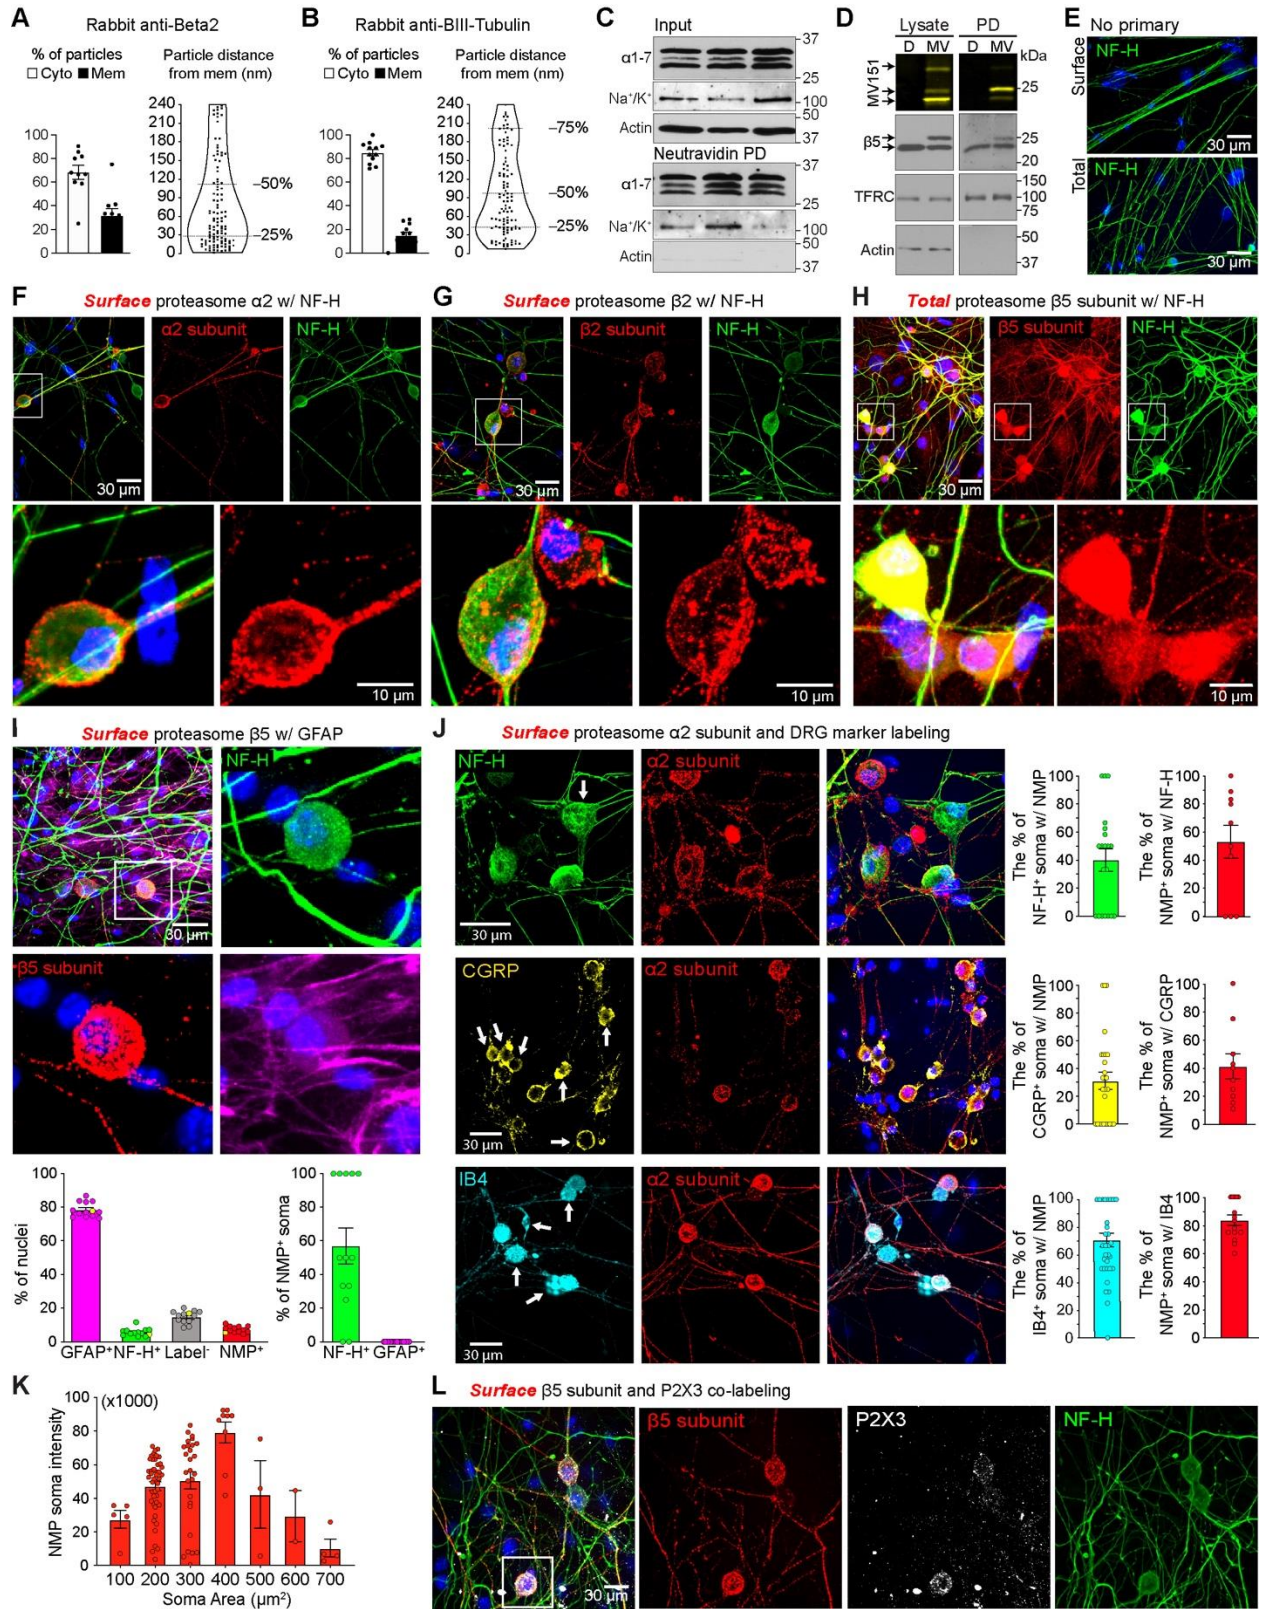

#### **Figure S4. Related to Figure 4.**

##### **Active NMPs localize on the somatic and axonal membranes of subgroups of DRG neurons**

(A) Quantification of immuno-EM proteasome localization in primary DRG cultures using an antibody against the  $\beta 2$  proteasome subunit (rabbit-anti- $\beta 2$ ) showing gold particles localized to the cytoplasm (Cyto) and membrane (Mem) (bar graph). Violin plot demonstrates a high abundance of proteasomes on neuronal membranes and distribution of particles away from membranes. Data are presented as mean  $\pm$  SEM (n = 10 micrographs analyzed).

(B) Immuno-EM particle localization analysis of  $\beta$ III-tubulin as intracellular control protein showing 80-90% particles localize to the cytoplasm. Note: unlike proteasome subunits there are no particles for  $\beta$ III-tubulin between 0 - 5 nm from the membrane. Data are presented as mean  $\pm$  SEM (n = 12 micrographs analyzed).

(C) Western blot of surface biotinylation and pulldown proteins showing detection of  $\alpha 1-7$  core subunits and membrane control  $\text{Na}^+/\text{K}^+$ -ATPase, but no cytoplasmic actin on neutravidin pulldown samples from cultured DRG neurons. Western blots represent experiments performed from several independent cultures in triplicates.

(D) Proteasome activity assay showing incorporation of activity-based probe, MV151, with catalytically active proteasome subunits in whole cell lysate and membrane pulldown fractions (top). Imaging was performed with a fluorescent gel imager. Immunoblotting for proteasome subunits shows shifting of the  $\beta 5$  proteasome subunit upon treatment with MV151 in whole cell lysate and membrane pulldown fractions (bottom). Membrane protein control TRFC was detected on both whole cell lysate and membrane fractions. Cytoplasmic protein, actin was only detected in whole cell lysate but not in membrane fraction.

(E) Representative immunofluorescent images showing no goat primary antibody controls for antibody feeding and total labeling of proteasome experiments. NF-H immunostaining (green) was used to mark neurons. Hoechst (blue) was used to label nuclei.

(F and G) Representative immunofluorescent images of DIV 6 cultured DRG neurons showing surface proteasome labeling using antibodies against the  $\alpha 2$  (F) and  $\beta 2$  (G) proteasome subunits.

(H) Representative images showing total (cytoplasmic and membrane) labeling of proteasomes using an antibodies against the  $\beta 5$  proteasome subunit. Total labeling shows labeling on soma and axons of DRG neurons as well as labeling on the other cells present in the culture. NF-H immunostaining (green) was used to label neurons, and Hoechst (blue) labels nuclei.

(I) Representative images of cultured DRG neurons showing surface  $\beta 5$  proteasome subunit labeling co-stained with antibodies against GFAP to label glia cells and NF-H to label neurons. Bar graphs show the % of nuclei in the cultures that stained positive for GFAP, NF-H, nuclei that were not positive for either GFAP or NF-H (Label-) and nuclei that were NMP positive (bar graph on the left). Bar graph on the right shows the % NMP positive nuclei that were also positive for NF-H and % NMP positive nuclei that were also positive for GFAP. Quantifications were calculated from multiple images per culture from at least three independent cultures. Each data point in these quantifications represents the observations from one image. Images for this experiment were acquired under the conditions that at least one cell in the field of view was positive for NMP and NF-H. Data are presented as mean  $\pm$  SEM (n = 13 images analyzed).

(J) Representative images showing NMP localization (red) on neurons in all three major neuronal subgroups labeled with neurochemical markers for NF-H (green, top), CGRP (yellow, middle), and IB4 (cyan, bottom), but not in every neuron within subgroup. Nuclei are labeled with Hoechst (blue). Bar graphs on the left show the % neurons labeled with each neurochemical maker that were also positive for NMP and the % NMP positive neurons that were also labeled for each of the three neurochemical markers. Each data point in these quantifications represents observations from one image. Data are represented in mean  $\pm$  SEM (n = 25 - 32 images analyzed).

(K) Bar graph scatterplot shows localization of NMP in different size soma. Data are presented as mean  $\pm$  SEM (n = 20 images analyzed).

(L) Representative images of dual surface labeling for P2X3 receptor and  $\beta$ 5 proteasome subunit on DIV 6 DRG neuron cultures. NF-H immunostaining (green) was used to label DRG neurons and Hoechst to label nuclei.

All DRG culture experiments represent at least three independent culture experiments where the cultures were obtained by dissecting and combining DRGs from four animals per culture.

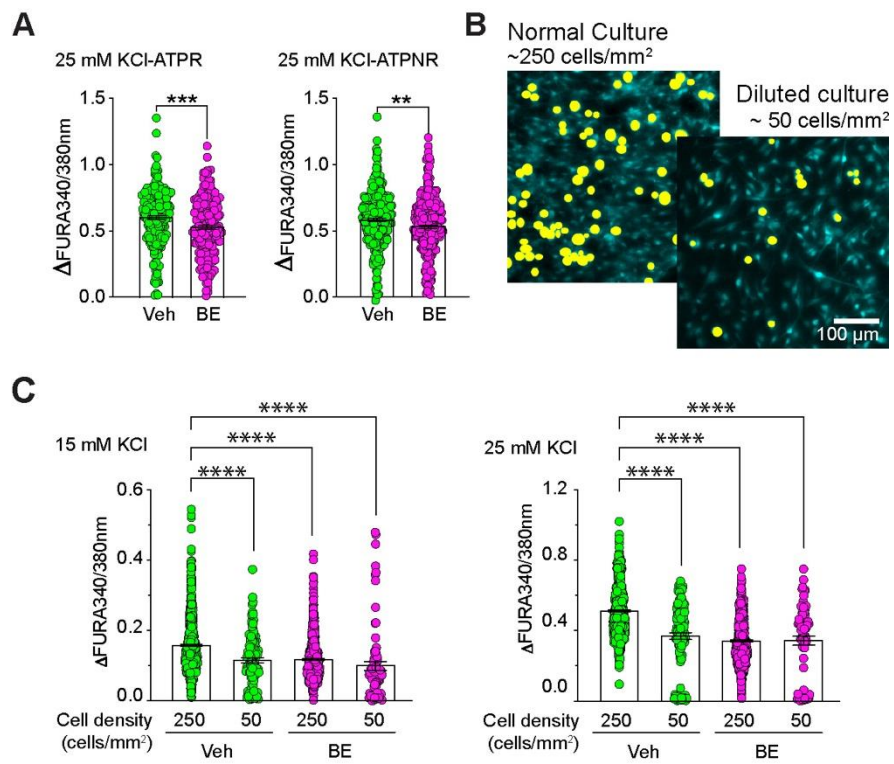

**Figure S5. Related to Figure 5.**

**The PNS NMP modulates neuronal responsiveness in a non-cell autonomous manner**

(A) Quantification of calcium imaging response to 25 mM KCl after pretreatment with  $\alpha\beta$ -meATP in  $\alpha\beta$ -meATP responsive neurons (ATPR) and  $\alpha\beta$ -meATP non-responsive neurons (ATPNR). Data are presented as mean  $\pm$  SEM (n = 3 for vehicle and 4 for BE). \*\*p < 0.01, \*\*\*p < 0.001 (one-way ANOVA with a Tukey's post hoc test).

(B) Representative images showing comparisons between normal density DRG (top) and low-density (bottom) cultures. Yellow circles represent individual DRG neurons.

(C) Calcium imaging responses to 15 and 25 mM KCl in normal (250) and diluted (50) density cultures. Quantifications show significantly reduced responses in normal cultures after BE treatment that were similarly reduced by diluting the cell density. BE treatment had no effect on stimulation response in diluted cultures. Data are presented as mean  $\pm$  SEM (n = 4). \*\*\*\*p < 0.0001 (one-way ANOVA with a Tukey's post hoc test).

All DRG culture experiments represent at least three independent culture experiments where the cultures were obtained by dissecting and combining DRGs from four animals per culture.





**Figure S6. Related to Figure 6 and Table S2, S3, and S4.**

**Single-cell RNA seq characterization of NMP positive neurons**

(A) Representative immunofluorescence images of dissociated DRG neurons showing cells that are positive (red) and negative for NMP labeled by antibody feeding using an antibody against the  $\beta 5$  proteasome subunit.

(B) Fluorescence-activated cell sorting (FACS) of dissociated DRG neurons that were labeled by antibody feeding. FACS plots show positive identification of cells that were 488-positive (NMP<sup>+</sup>) from a larger pool of cells that are 488-negative. No primary antibody feeding control (right) shows no detection of cells that were 488-positive.

(C and D) Data from scRNA seq. (C) Volcano plots of differential gene expression comparisons of the NMP-positive peptidergic vs. NMP-negative peptidergic neurons (top) and NMP positive SST vs. all NMP-negative neurons (bottom). (D) Heatmap of top differentially expressed genes showing the top 100 genes that are specifically expressed in NMP-positive SST and CGRP- $\theta$  neurons. Expression scale shown at the bottom of the heatmap. Differential expression was performed comparing each cluster to all other cells in the data set using Mann-Whitney U test. Genes were selected by fold-change.



**No pretreatment**

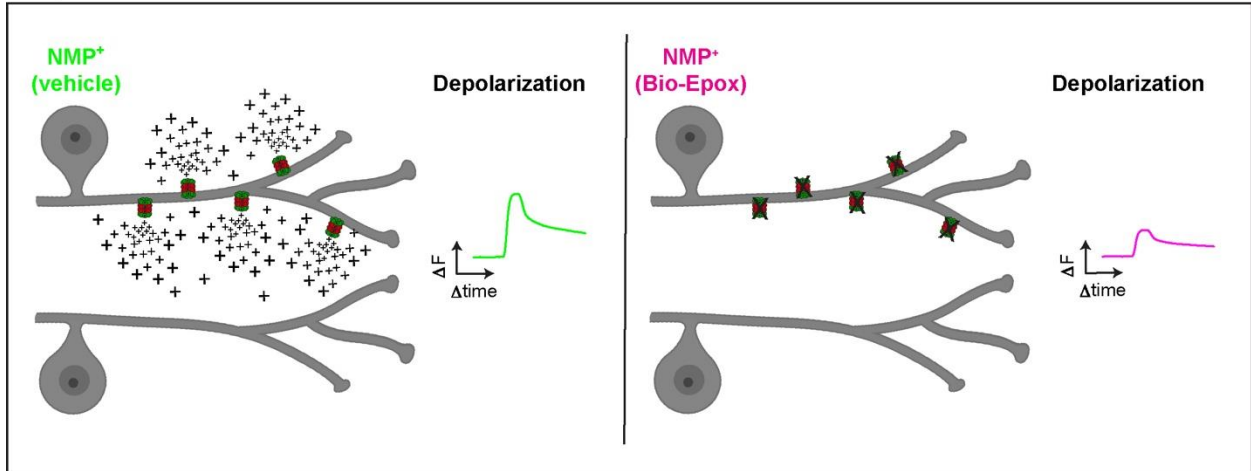

**Histamine pretreatment**

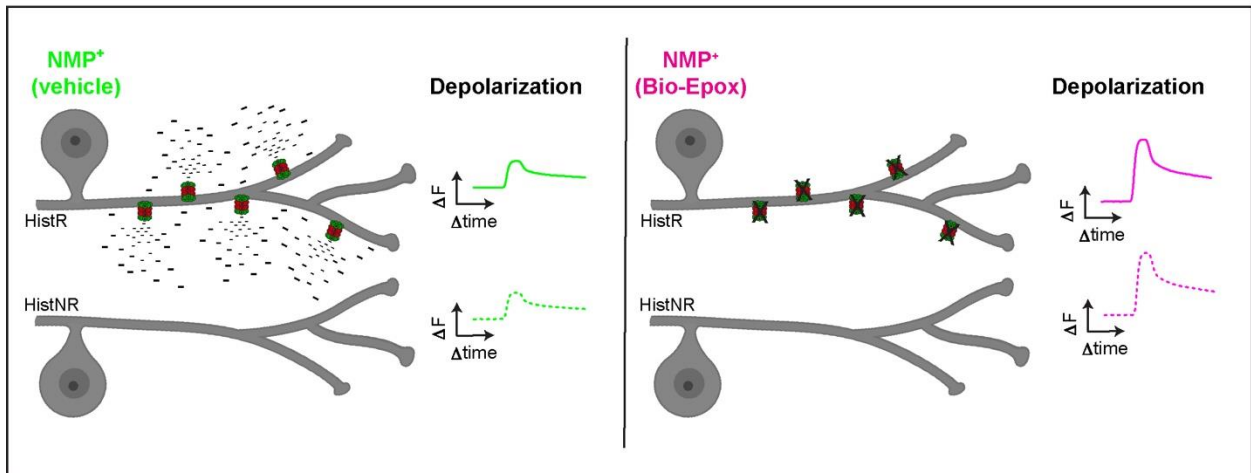

## **Figure S7.**

### **The PNS NMP is a mediator of somatosensory neuron ‘crosstalk’ that modulates context dependent response to stimulation**

Our data favors the following model. (Top left) Under baseline conditions (no pretreatment) NMP<sup>+</sup> neurons enhance the sensitivity to depolarization of all neighboring neurons (NMP expressing and NMP non-expressing). (Top right) This, we believe, occurs through the NMP as the addition of bio-epox, which inhibits the NMP, leads to decreased sensitivity to depolarization. (Bottom left) In contrast, pretreatment with histamine switches the NMP<sup>+</sup> neuron to inhibit the sensitivity to depolarization of all neighboring neurons (histamine responsive and histamine non-responsive). (Bottom Right) Again, we believe this occurs through the NMP as addition of bio-epox now leads to increased sensitivity to stimulation.
